# Supplementary material
Source: HighWire-hosted journal article supplement (http://thorax.bmjjournals.com/highwire/filestream/173755/field_highwire_adjunct_files/0/617559figS1.pdf)

Figure 1 Differences in measurements at isotime during constant-load cycle exercise for O<sub>2</sub>-induced “volume responders” (i.e., those who increased exercise IC) and “non-responders” (i.e. those with no change in exercise IC). Values are mean (SE). \*p<0.05 with 50% oxygen (O<sub>2</sub>) compared to room air (RA), each combined with placebo (PL). Ti, inspiratory time; Te, expiratory time; VT/Ti, mean tidal inspiratory flow; VT/Te, mean tidal expiratory flow; dyspnea, intensity of exertional breathing discomfort.

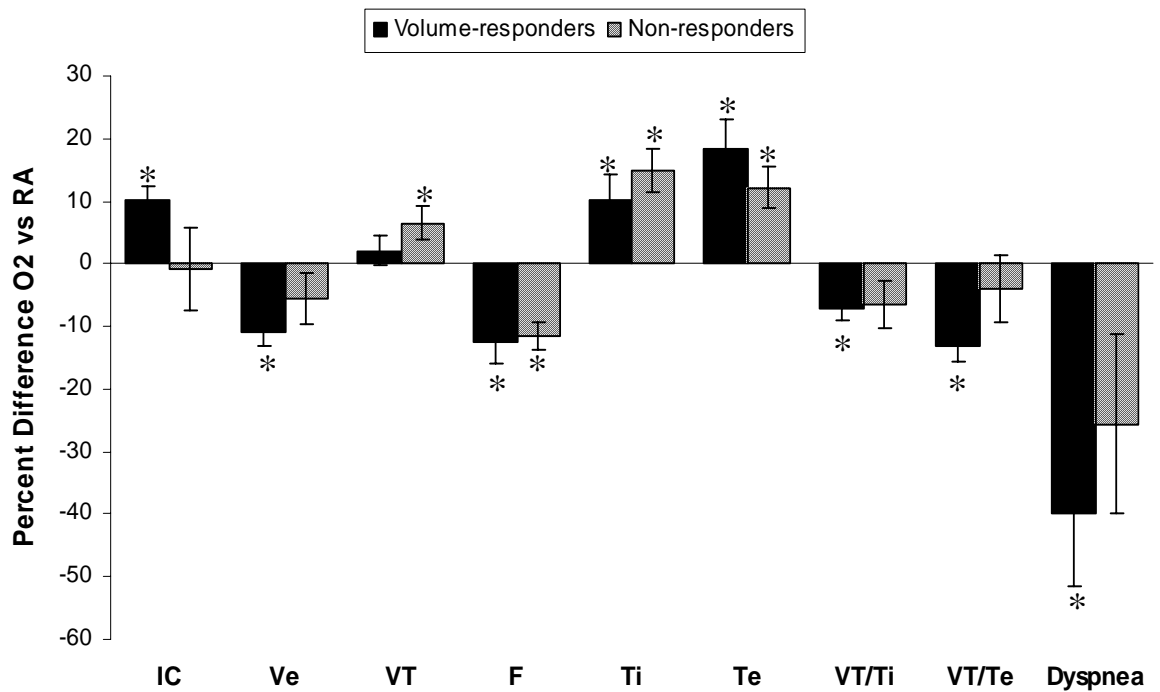

Supplement: 617559figS1.pdf [file 617559figS1.pdf]
